# Supplementary material for: Social prescribing: less rhetoric and more reality. A systematic review of the evidence
Source: PubMed Central journal article supplement (PMC5558801; doi:10.1136/bmjopen-2016-013384), 2017-04-06
Supplement: bmjopen-2016-013384supp001.pdf [file bmjopen-2016-013384supp001.pdf]

## **Appendix 1: Search strategies**

### **ASSIA via Proquest Search date 26<sup>th</sup> June 2015 and 5<sup>th</sup> February 2016**

"social prescrib\*" OR "social prescrip\*" OR "community referral\*"

### **CINAHL via EBSCO search date 26<sup>th</sup> June 2015 and 5<sup>th</sup> February 2016**

social prescribing OR "social prescrip\*" OR "community referral\*"

### **Ovid MEDLINE(R) In-Process & Other Non-Indexed Citations and Ovid MEDLINE(R)**

**<1946 to Present> searched 26<sup>th</sup> June 2015 and 5<sup>th</sup> February 2016**

- 1 social prescrib\$.ti,ab.
- 2 social prescrip\$.ti,ab.
- 3 community referral\$.ti,ab.
- 4 non-medical referral\$.ti,ab.
- 5 well being program\$.ti,ab.
- 6 well-being program\$.ti,ab.
- 7 wellbeing program\$.ti,ab.
- 8 1 or 2 or 3 or 4 or 5 or 6 or 7

### **Social Care Online via <http://www.scie-socialcareonline.org.uk/> searched 26<sup>th</sup> June 2015 and 5<sup>th</sup> February 2016**

"Social prescribing" OR "social prescription\*" or "community referral\*"

### **Social Policy & Practice via OVID search date 26<sup>th</sup> June 2015 and 5<sup>th</sup> February 2016**

- 1 social prescrib\$.ti,ab.
- 2 social prescrip\$.ti,ab.
- 3 community referral\$.ti,ab.
- 4 non-medical referral\$.ti,ab.
- 5 well being program\$.ti,ab.
- 6 well-being program\$.ti,ab.
- 7 wellbeing program\$.ti,ab.
- 8 1 or 2 or 3 or 4 or 5 or 6 or 7

### **Google search last performed 5<sup>th</sup> January 2016**

Two reviewers independently searched google.co.uk using the search terms "social prescribing" and "community referral" and reviewed the search results from the first 10 pages
